# Supplementary material
Source: PubMed Central journal article supplement (PMC5785467)

## Supplementary Figure - Uncropped scan with molecular weight markers

### Extended Data Figure 6b

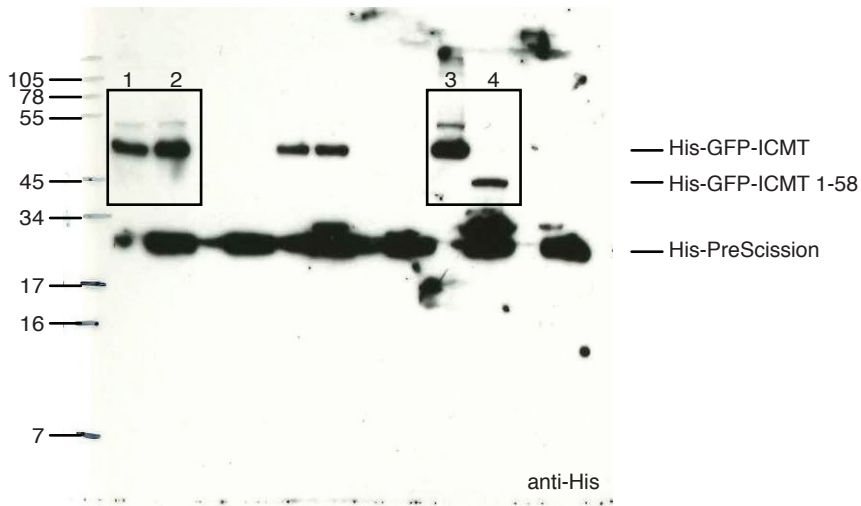

Supplement: NIHMS926179-supplement-Supplementary_Figure.pdf [file NIHMS926179-supplement-Supplementary_Figure.pdf]
